# Supplementary material for: Preparation and characterization of PtIr alloy dendritic nanostructures with superior electrochemical activity and stability in oxygen reduction and ethanol oxidation reactions
Source: Royal Society of Chemistry journal article supplement (doi:10.1039/c5cy01054c), 2015-08-20
Supplement: c5cy01054c1.pdf [file c5cy01054c1.pdf]

## Supporting Information

### **Preparation and Characterization of PtIr Alloy Dendritic Nanostructures for Superior Electrochemical Activity and Stability in Oxygen Reduction and Ethanol Oxidation Reactions**

*Young-Woo Lee,<sup>†,‡,§</sup> Eui-Tak Hwang,<sup>†,§</sup> Da-Hee Kwak,<sup>†</sup> and Kyung-Won Park<sup>\*,†</sup>*

<sup>†</sup> Department of Chemical Engineering, Soongsil University, Seoul 156-743, Republic of Korea.

<sup>‡</sup> Department of Engineering Science, University of Oxford, Oxford OX1 3PJ, United Kingdom.

<sup>§</sup> These authors contributed equally to this work.

\* Corresponding author. Tel: 82-2-820-0613. Fax: 82-2-812-5378.

E-mail address: kwpark@ssu.ac.kr (Prof. K.-W. Park).

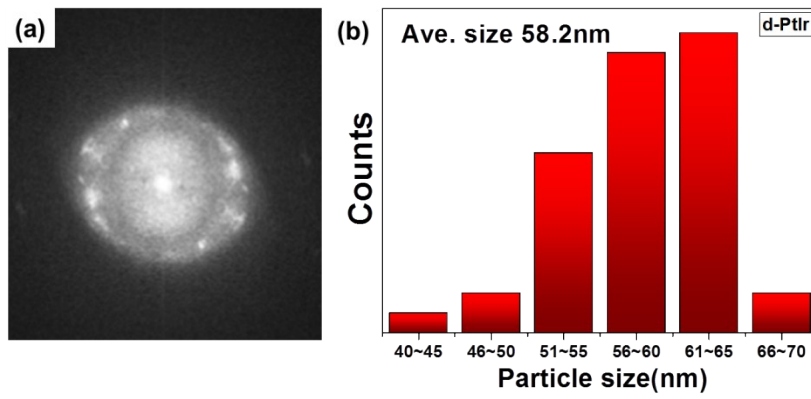

**Figure S1.** (a) Fast Fourier-transform (FFT) pattern corresponding to the HR-TEM image of Figure 1(b). The dendritic Pt-Ir alloy nanostructures consist of polycrystalline structures. (b) Particle size distribution of the dendritic Pt-Ir alloy nanostructures.

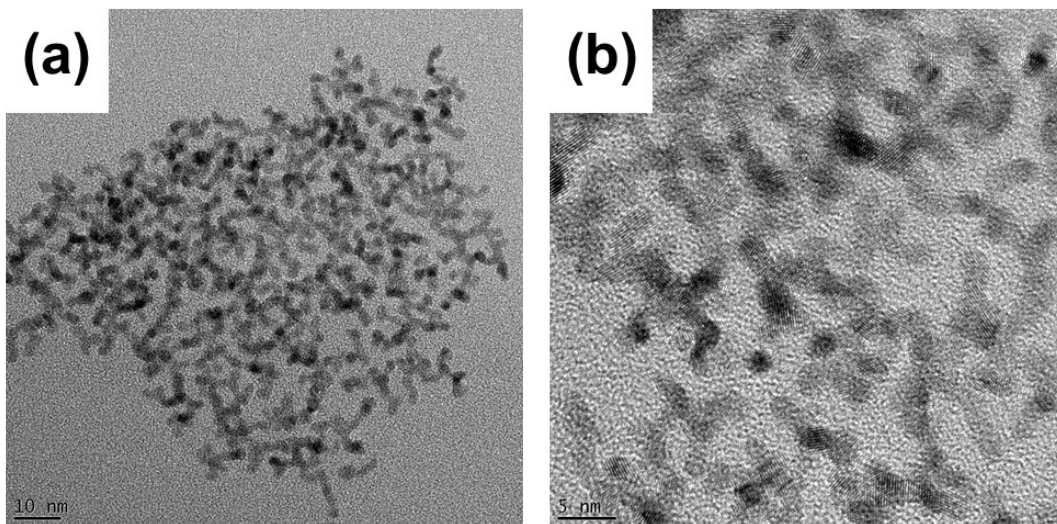

**Figure S2.** Field-emission transmission electron microscopy (FE-TEM) images of the Pt-Ir nanostructures prepared in the absence of a CTAC.

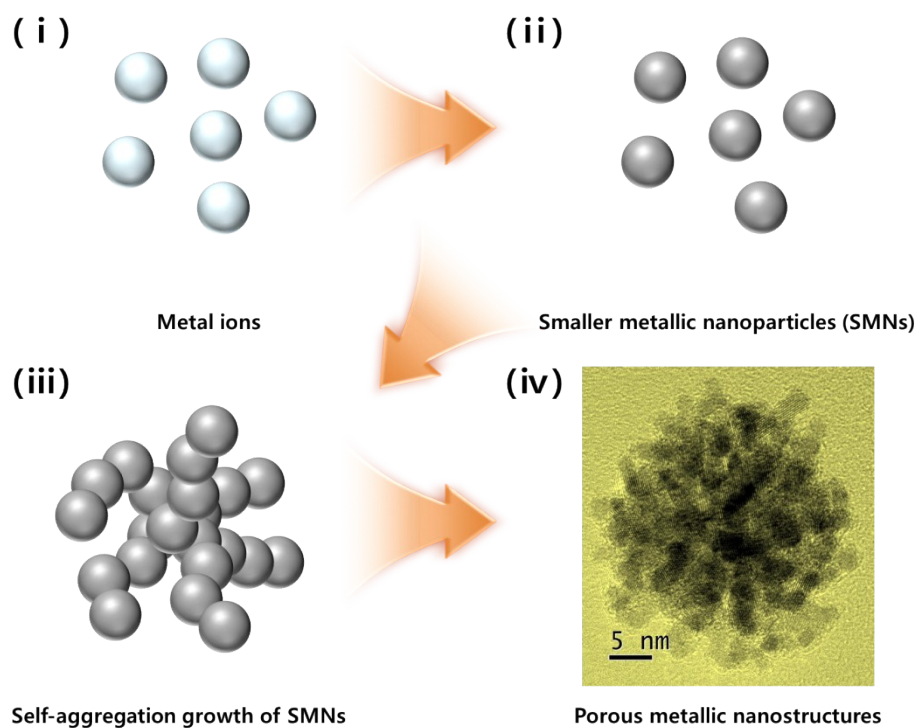

**Figure S3.** Schematic illustration of the synthesis of the porous Pt-Ir alloy nanostructures in the presence of a CTAC.

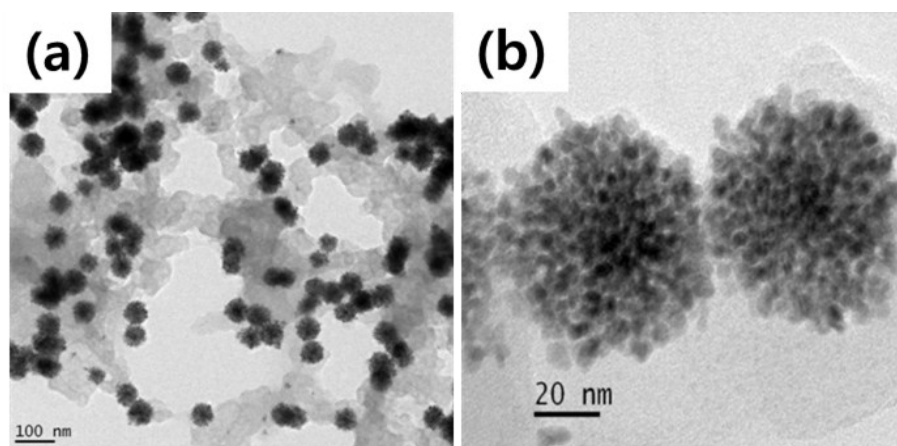

**Figure S4.** (a and b) FE-TEM images of the d-PtIr NPs deposited on carbon black.

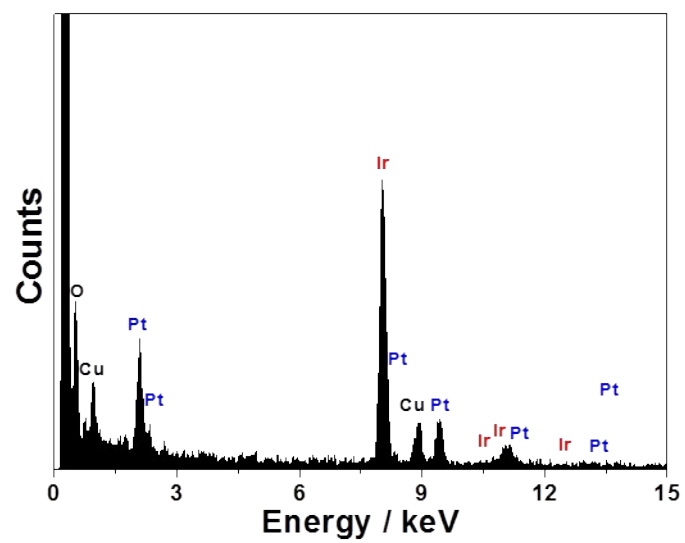

**Figure S5.** EDX spectrum of s-PtIr NPs.

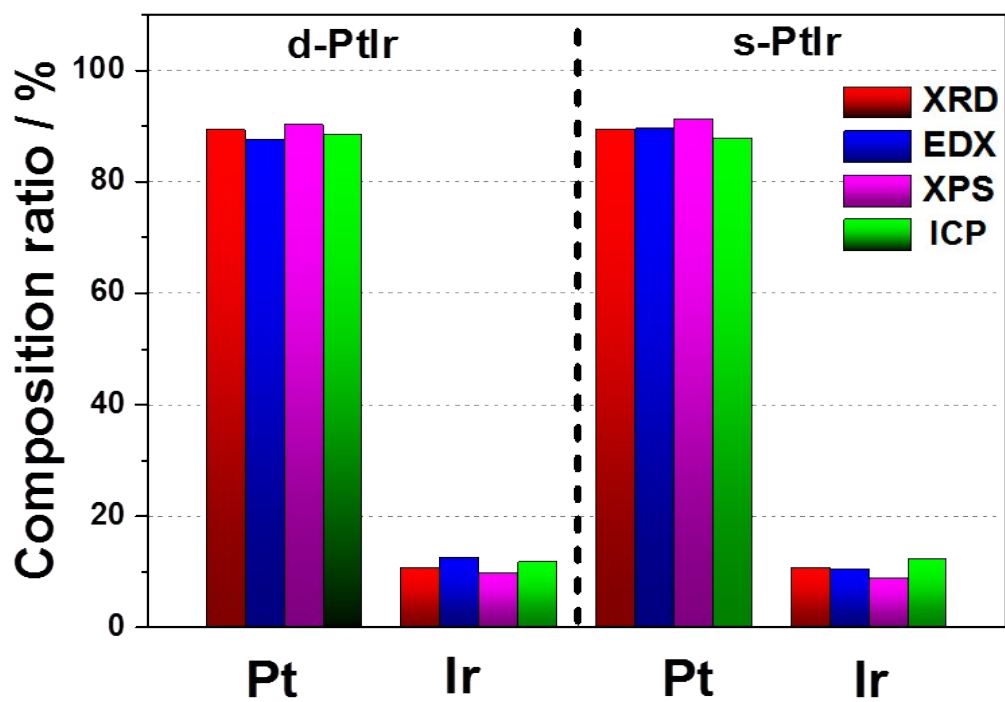

**Figure S6.** Comparison of the elemental compositions of Pt and Ir in d-PtIr and s-PtIr nanostructures measured using XRD, EDX, XPS, and ICP-MS.

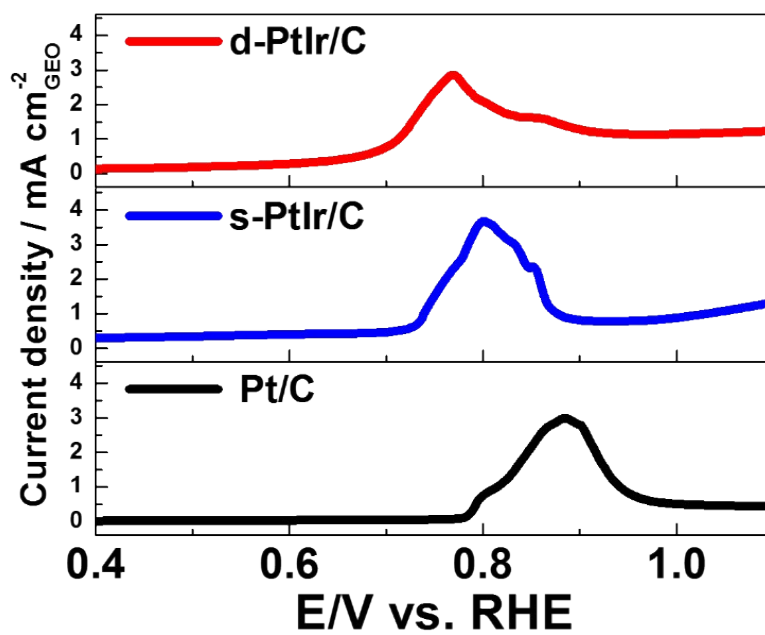

**Figure S7.** CO-stripping voltammograms of the d-PtIr/C, s-PtIr/C, and Pt/C electrocatalysts in 0.1 M HClO<sub>4</sub>.



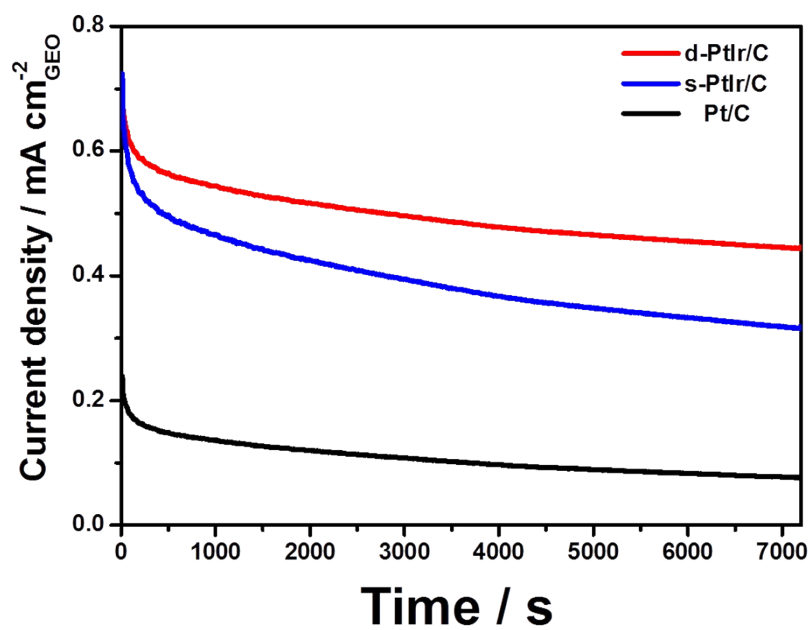

**Figure S8.** Chronoamperometric curves of the d-PtIr/C, s-PtIr/C, and Pt/C electrocatalysts at 0.5 V (vs. Ag/AgCl) for 7200 s in 0.1 M HClO<sub>4</sub> + 0.2 M C<sub>2</sub>H<sub>5</sub>OH.

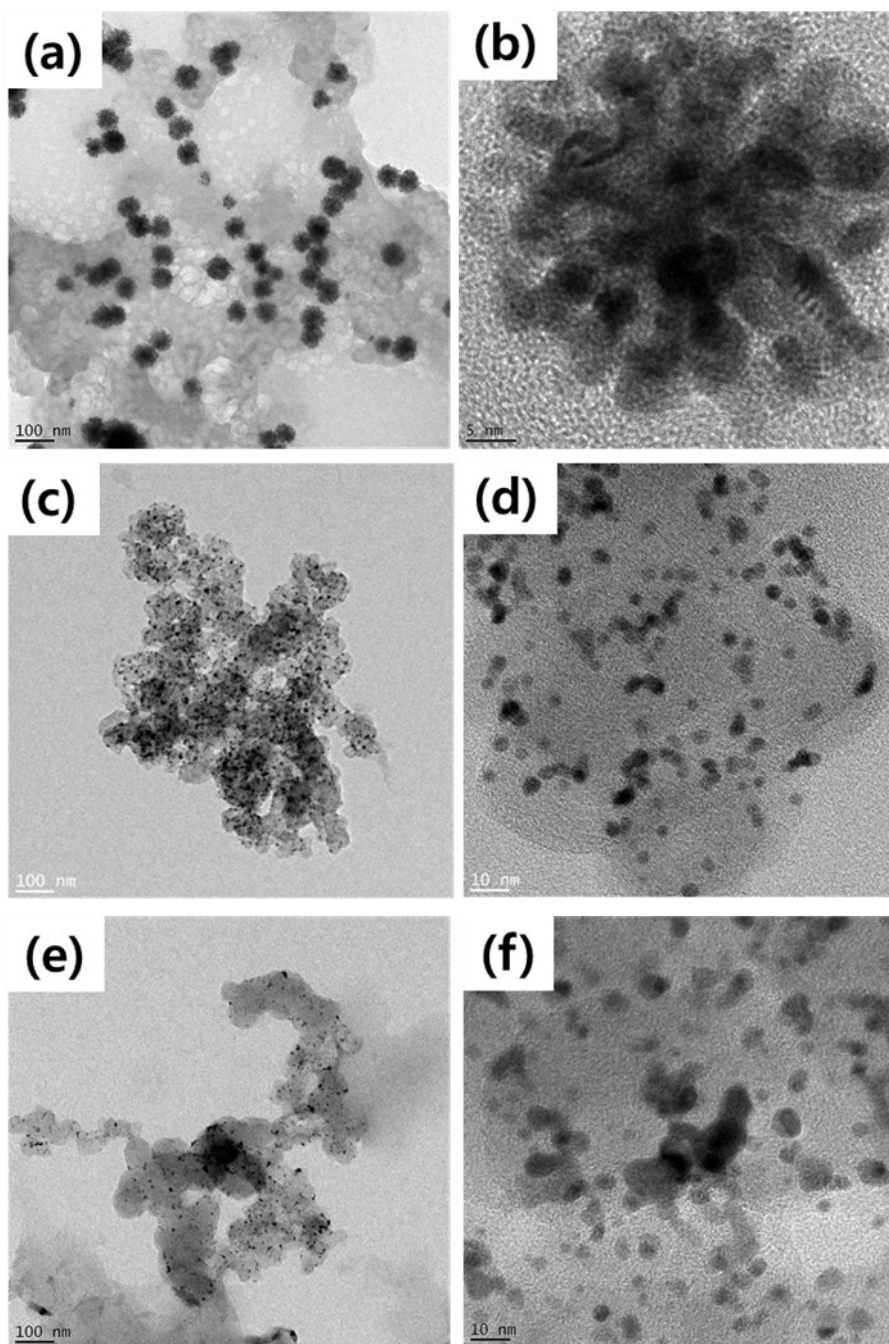

**Figure S9.** FE-TEM and HR-TEM images of (a and b) d-PtIr/C, (c and d) s-PtIr/C, and (e and f) Pt/C electrocatalysts after stability test in ORR, respectively.
